# Supplementary material for: Differential roles of human CD4+ and CD8+ regulatory T cells in controlling self-reactive immune responses
Source: PubMed Central journal article supplement (PMC11785521; doi:10.1038/s41590-024-02062-x), 2025-01-13
Supplement: 41590_2024_2062_MOESM1_ESM.pdf [file 41590_2024_2062_MOESM1_ESM.pdf]

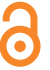

---

# Differential roles of human CD4<sup>+</sup> and CD8<sup>+</sup> regulatory T cells in controlling self-reactive immune responses

---

In the format provided by the authors and unedited

---

| Donor ID | gender | Age | Ethnicity/Race       |
|----------|--------|-----|----------------------|
| IMD105   | F      | 16  | Caucasian            |
| IMD180   | M      | 10  | Hispanic/Latino      |
| IMD181   | M      | 4   | Unkown               |
| IMD182   | M      | 15  | Hispanic/Latino      |
| IMD183   | M      | 17  | Hispanic/Latino      |
| IMD191   | F      | 9   | Hispanic/Latino      |
| IMD192   | F      | 15  | Hispanic/Latino      |
| IMD196   | M      | 12  | Hispanic/Latino      |
| PED40    | M      | 14  | Unkown               |
| PED44    | F      | 7   | Unkown               |
| PED48    | M      | 4   | Unkown               |
| PED132   | M      | 8   | Unkown               |
| VIP26    | F      | 51  | ∟Hispanic/Non-Latino |
| VIP27    | M      | 35  | ∟Hispanic/Non-Latino |
| VIP33    | F      | 52  | Hispanic/Latino      |
| VIP38    | F      | 63  | ∟Hispanic/Non-Latino |
| VIP53    | F      | 63  | Asian                |
| VIP57    | M      | 63  | ∟Hispanic/Non-Latino |
| VIP58    | M      | 66  | ∟Hispanic/Non-Latino |
| VIP60    | F      | 59  | Hispanic/Latino      |
| VIP63    | M      | 42  | ∟Hispanic/Non-Latino |
| VIP64    | F      | 60  | ∟Hispanic/Non-Latino |
| VIP67    | M      | 40  | Hispanic/Latino      |
| VIP68    | M      | 25  | Hispanic/Latino      |
| VIP69    | M      | 44  | Hispanic/Latino      |
| VIP74    | F      | 19  | ∟on-Hispanic/Latino  |
| VIP76    | M      | 22  | Hispanic/Latino      |
| VIP80    | F      | 37  | ∟on-Hispanic/Latino  |
| VIP82    | F      | 49  | Hispanic/Latino      |
| VIP84    | M      | 43  | ∟on-Hispanic/Latino  |
| VIP85    | F      | 37  | ∟on-Hispanic/Latino  |
| VIP88    | F      | 29  | Unknown              |
| VIP89    | F      | 28  | Hispanic/Latino      |
| VIP94    | F      | 38  | Hispanic/Latino      |
| VIP95    | F      | 21  | ∟on-Hispanic/Latino  |
| VIP99    | F      | 16  | ∟on-Hispanic/Latino  |
| VIP100   | F      | 50  | ∟on-Hispanic/Latino  |
| VIP102   | M      | 23  | Unknown              |
| VIP105   | F      | 39  | Asian                |
| VIP106   | F      | 22  | Hispanic/Latino      |

|        |   |    |                         |
|--------|---|----|-------------------------|
| VIP108 | M | 53 | Unknown                 |
| VIP124 | M | 28 | Hispanic/Latino         |
| VIP148 | M | 48 | Non-Hispanic/Non-Latino |
| VIP151 | F | 32 | Non-Hispanic/Non-Latino |
| VIP156 | M | 43 | Non-Hispanic/Non-Latino |
| VIP158 | M | 45 | Unknown                 |
| VIP159 | M | 37 | Non-Hispanic/non-Latino |
| VIP173 | M | 17 | Unknown                 |
| VIP174 | F | 48 | Unknown                 |
| VIP175 | M | 22 | Unknown                 |
| VIP179 | M | 56 | Unknown                 |
